# Supplementary material for: Arbuscular Mycorrhizal Fungi Improve Lycium barbarum Potassium Uptake by Activating the Expression of LbHAK
Source: MDPI journal article supplement (doi:10.3390/plants13091244), 2024-04-30
Supplement: s1 [file s1]

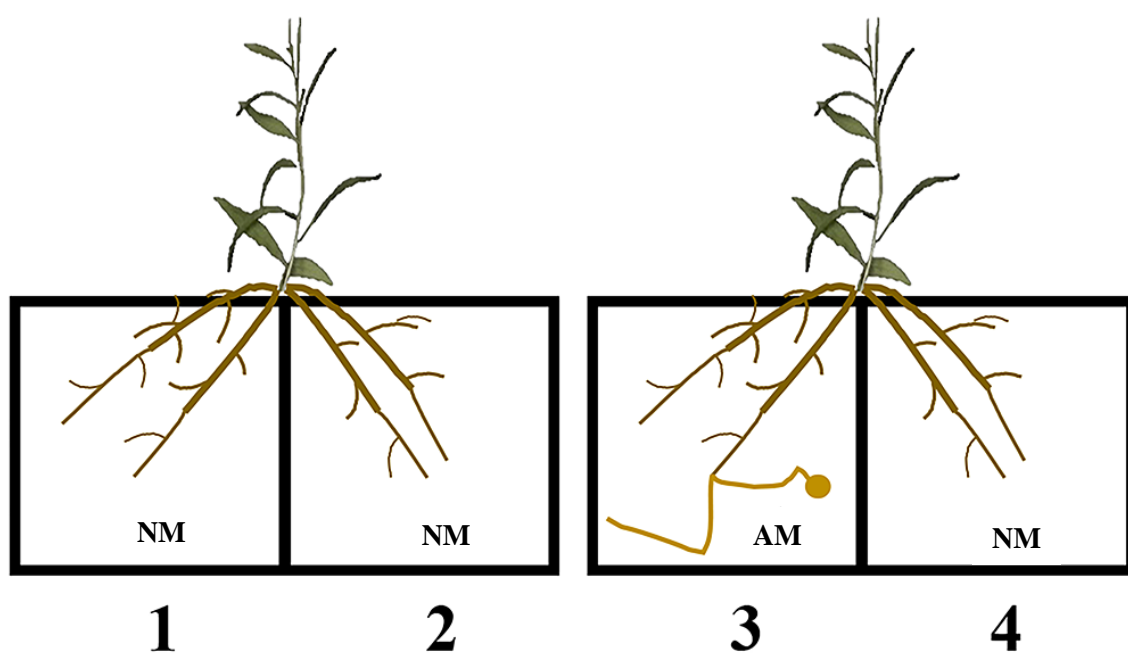

**Figure S1. Schematic diagram of the split-roots system.**

AM represents roots with AM inoculation, NM represents roots without AM inoculation, and the number at the bottom of the root compartment represents the four type roots.

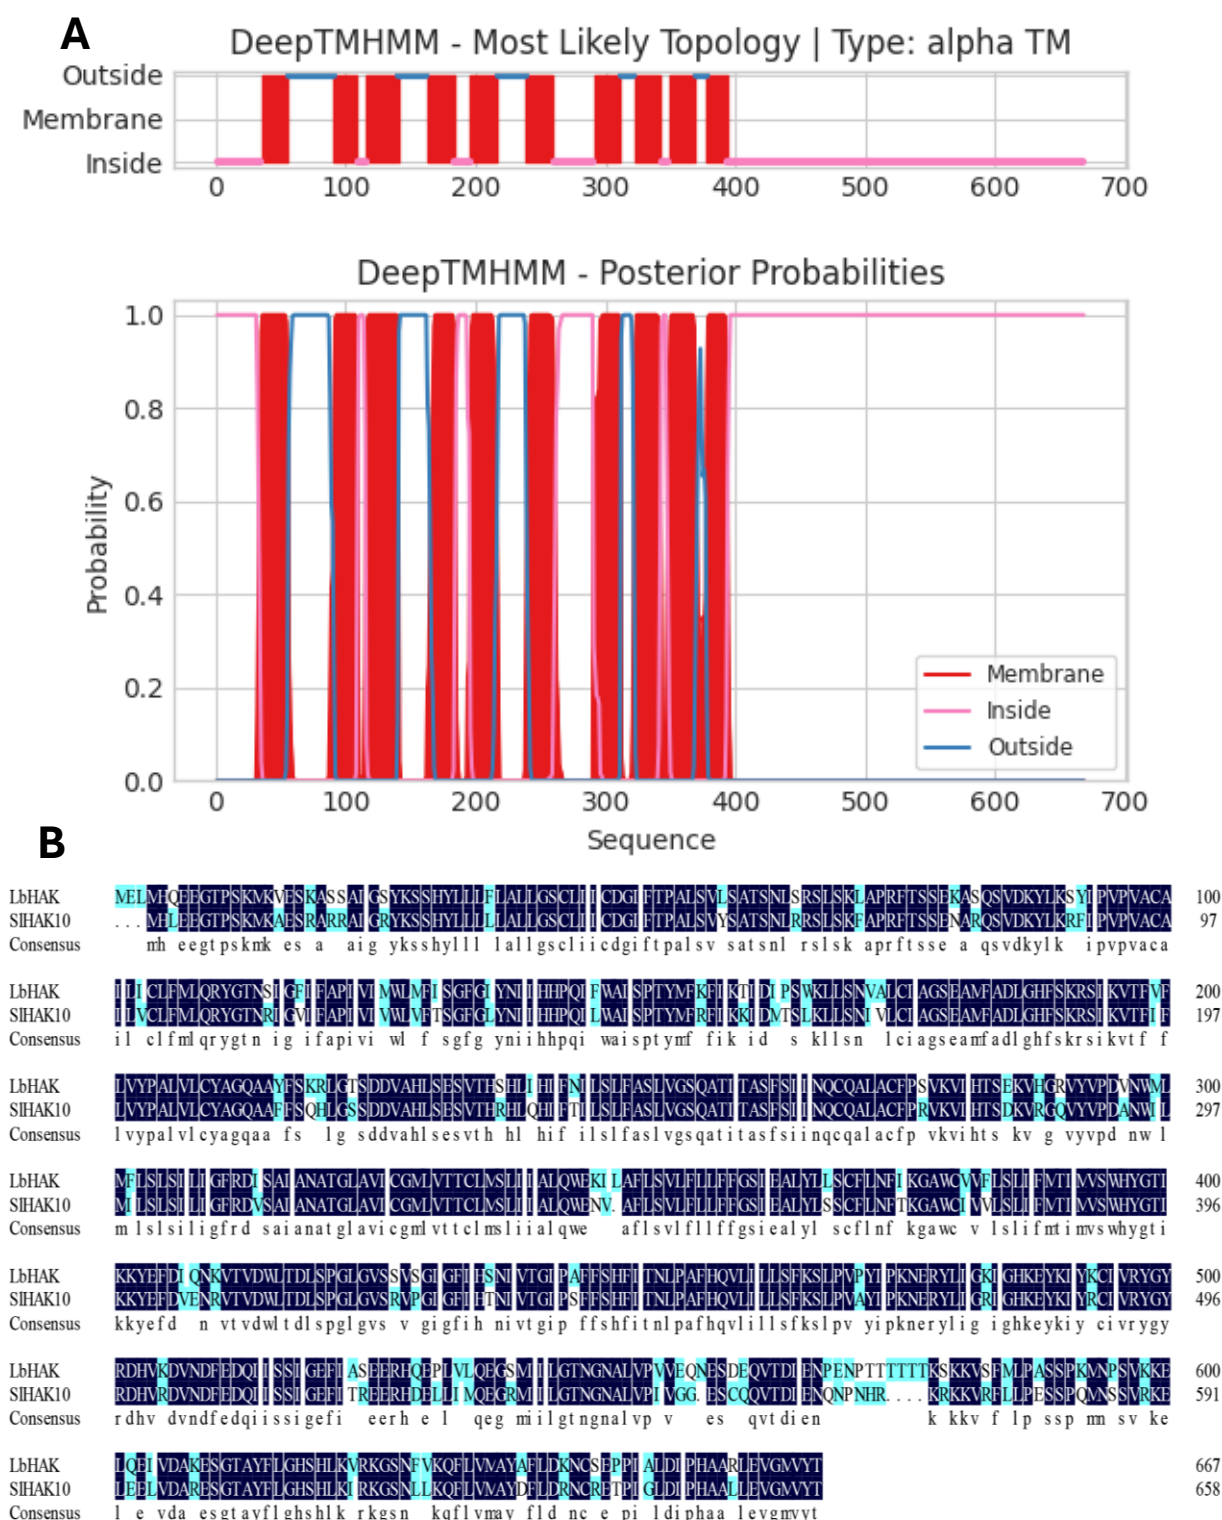

**Figure S2. Bioinformation analysis of *LbHAK*.** The putative transmembrane domains of *LbHAK* (A), and multiple alignment of the deduced amino acid sequences of *LbHAK* in *L. barbarum* with *SlHAK10* in tomato (B).

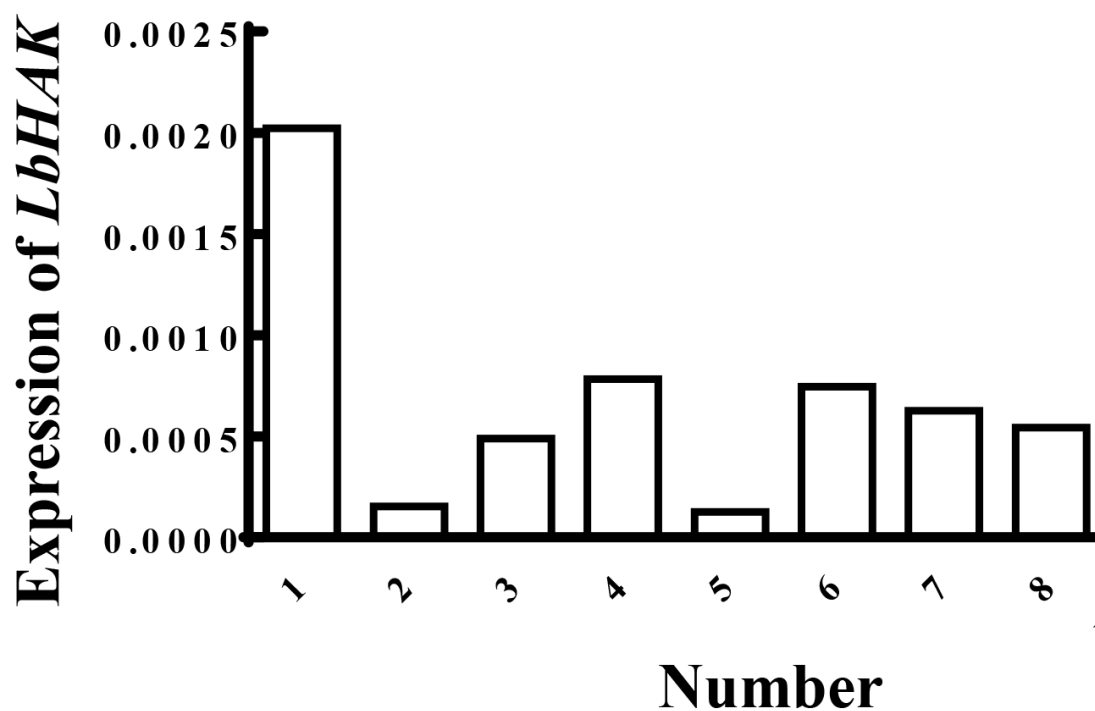

**Figure S3. Detection of *LbHAK* expression in different transgenic tobacco plants.**

The number represents different transgenic tobacco lines.
