# Supplementary material for: Arbuscular Mycorrhizal Fungi Improve Lycium barbarum Potassium Uptake by Activating the Expression of LbHAK
Source: MDPI journal article supplement (doi:10.3390/plants13091244), 2024-04-30
Supplement: s1 [file s1]

**Table S1 Primers used for clone and quantitative real-time PCR (qRT-PCR)**

| Gene name                        | Primer names         | Primer sequences (5'-3')         | Used for        | Annealing temperature (°C) |
|----------------------------------|----------------------|----------------------------------|-----------------|----------------------------|
| <i>LbHAK</i>                     | LbHAK-3outer         | GTTGATGCAAGGGAAAGTGGCACTGCC<br>T | 3' RACE         | 55                         |
|                                  | LbHAK-3inward        | GTTGATGCAAGGGAAAGTGGCACTGCC<br>T | 3' RACE         | 55                         |
|                                  | LbHAK-5outer         | AAGGGCAAGAAGAGCGATTGGAAGAT<br>A  | 5' RACE         | 55                         |
|                                  | LbHAK-5inward        | CGTTCATTGTCAAAATTGGCACCCTCGA     | 5' RACE         | 55                         |
|                                  | LbHAK-f              | CGTTTAGTCAATCCTCTCAGC            | Full length PCR | 55                         |
|                                  | LbHAK-r              | TCCCAGTCGTCGCAGAGTTAGAA          | Full length PCR | 55                         |
| <i>LbActin</i>                   | Q-LbActin-f          | TCTACGAGGGTTACGCTTTG             | qRT-PCR         | 55                         |
|                                  | Q-LbActin-r          | TCCCGTTCAGCAGTGGTT               | qRT-PCR         | 55                         |
| <i>LbHAK</i>                     | Q-LbHAK-f            | ACAAGGTGACTGTGGACTGGCT           | qRT-PCR         | 55                         |
|                                  | Q-LbHAK-r            | TGGGAATGTATGGCACGGGC             | qRT-PCR         | 55                         |
| <i>NtPT4</i>                     | Q-NtPT4-f            | CGCTAGCAAAGCCCAACACAT            | qRT-PCR         | 55                         |
|                                  | Q- NtPT4-r           | CGCTAGCAAAGCCCAACACAT            | qRT-PCR         | 55                         |
| <i>NtEF1<math>\alpha</math></i>  | Q-NtEF1 $\alpha$ -f  | TATGATTACTGGTACCTCCC             | qRT-PCR         | 55                         |
|                                  | Q-NtEF1 $\alpha$ -r  | ACCTAGCCTTGGAATACTTG             | qRT-PCR         | 55                         |
| <i>Rir-AQP1</i>                  | Q-Rir-AQP1-f         | CTTGCTATTCCATTTCAGTTTCGG         | qRT-PCR         | 55                         |
|                                  | Q-Rir-AQP1-r         | TTTTTTTTTACTTTTTTGGGGTCC         | qRT-PCR         | 55                         |
| <i>Rir-AQP2</i>                  | Q-Rir-AQP2-f         | AGAGTCAGGAGGAGGAACAAGAG          | qRT-PCR         | 55                         |
|                                  | Q-Rir-AQP2-r         | CTAACTGCAATACCCAAAGCGAG          | qRT-PCR         | 55                         |
| <i>GintEF<math>\alpha</math></i> | Q-GintEF $\alpha$ -f | AATCAGTTGAAATGCACCACGAAC         | qRT-PCR         | 55                         |
|                                  | Q-GintEF $\alpha$ -f | CGACGAATTTCTTTGACTGATACGTT       | qRT-PCR         | 55                         |

**Table S2 Information for yeast strains and plasmids.**

| Name   | Description                                                                                           | Reference |
|--------|-------------------------------------------------------------------------------------------------------|-----------|
| CY162  | <i>MAT<math>\alpha</math> ura3-52 his4-15 trk1<math>\Delta</math> trk2<math>\Delta</math>1::pCK64</i> | [1]       |
| BY4741 | Wild-type for CY162 strain                                                                            | [2]       |
| pYES2  | Yeast gene expression plasmid                                                                         | [3]       |
| pROKII | Plant gene overexpressing plasmid                                                                     | [4]       |

Reference:

1. Anderson, J.A.; Huprikar, S.S.; Kochian, L.V.; Lucas, W.J.; Gaber, R.F. Functional expression of a probable *Arabidopsis thaliana* potassium channel in *Saccharomyces cerevisiae*. Proceedings of the National Academy of Sciences 1992, 89, 3736-3740.
2. Winston, F.; Dollard, C.; Ricupero-Hovasse, S.L. Construction of a set of convenient *Saccharomyces cerevisiae* strains that are isogenic to S288C. Yeast 1995, 11, 53-55.
3. Reddy, A.; Maley, F. Studies on identifying the catalytic role of Glu-204 in the active site of yeast invertase. Journal of Biological Chemistry 1996, 271, 13953-13957, doi:10.1074/jbc.271.24.13953.
4. Liu, L.; Qu, J.; Wang, C.; Liu, M.; Zhang, C.; Zhang, X.; Guo, C.; Wu, C.; Yang, G.; Huang, J.; et al. An efficient genetic transformation system mediated by *Rhizobium rhizogenes* in fruit trees based on the transgenic hairy root to shoot conversion. Plant Biotechnology Journal 2024, doi:https://doi.org/10.1111/pbi.14328.

Table S3 ANONA analysis of the detected parameters in this study.

|                                      | Shoot fresh weight | Root fresh weight | Total Fresh weight | Shoot potassium content | Root potassium content | Total potassium content | Shoot phosphorus content | Root phosphorus content | Root phosphorus content |
|--------------------------------------|--------------------|-------------------|--------------------|-------------------------|------------------------|-------------------------|--------------------------|-------------------------|-------------------------|
| $P_{AMF}$                            | ***                | ***               | ***                | ***                     | ***                    | ***                     | ***                      | ***                     | ***                     |
| $P_K$                                | *                  | ***               | ***                | ***                     | ***                    | ***                     | **                       | ***                     | ***                     |
| $P_{Line}$                           | ***                | ns                | ***                | ***                     | ***                    | ***                     | **                       | ***                     | ***                     |
| $P_{AMF} \times P_K$                 | ns                 | *                 | ns                 | ns                      | ***                    | *                       | ns                       | **                      | *                       |
| $P_{AMF} \times P_{Line}$            | ns                 | ns                | ns                 | ns                      | ns                     | ns                      | ns                       | **                      | ns                      |
| $P_K \times P_{Line}$                | ns                 | ns                | ns                 | ns                      | ns                     | ns                      | ns                       | ns                      | ns                      |
| $P_{AMF} \times P_K \times P_{Line}$ | ns                 | ns                | ns                 | **                      | ns                     | *                       | ns                       | **                      | ns                      |

  

|                       | Colonization rate | Arbuscular rate | Relative expression of <i>GintEF1α</i> in roots | Relative expression of <i>NtPT4</i> in roots | Relative expression of <i>Rir-AQP1</i> in roots | Relative expression of <i>Rir-AQP2</i> in roots |
|-----------------------|-------------------|-----------------|-------------------------------------------------|----------------------------------------------|-------------------------------------------------|-------------------------------------------------|
| $P_{Line}$            | ***               | **              | **                                              | **                                           | ***                                             | ***                                             |
| $P_K$                 | ***               | **              | ns                                              | ns                                           | ns                                              | ***                                             |
| $P_{Line} \times P_K$ | *                 | ns              | ns                                              | ns                                           | ns                                              | **                                              |

Note: \* P < 0.05; \*\* P < 0.01; \*\*\* P < 0.001; ns, no significant.
